# Supplementary material
Source: PubMed Central journal article supplement (PMC7366523)
Supplement: NIHMS1598380-supplement-1.pdf [file NIHMS1598380-supplement-1.pdf]

### Extra-axial Cerebrospinal Fluid Relationships to Infant Brain Structure, Cognitive Development, and Risk for Schizophrenia

#### Supplement 1

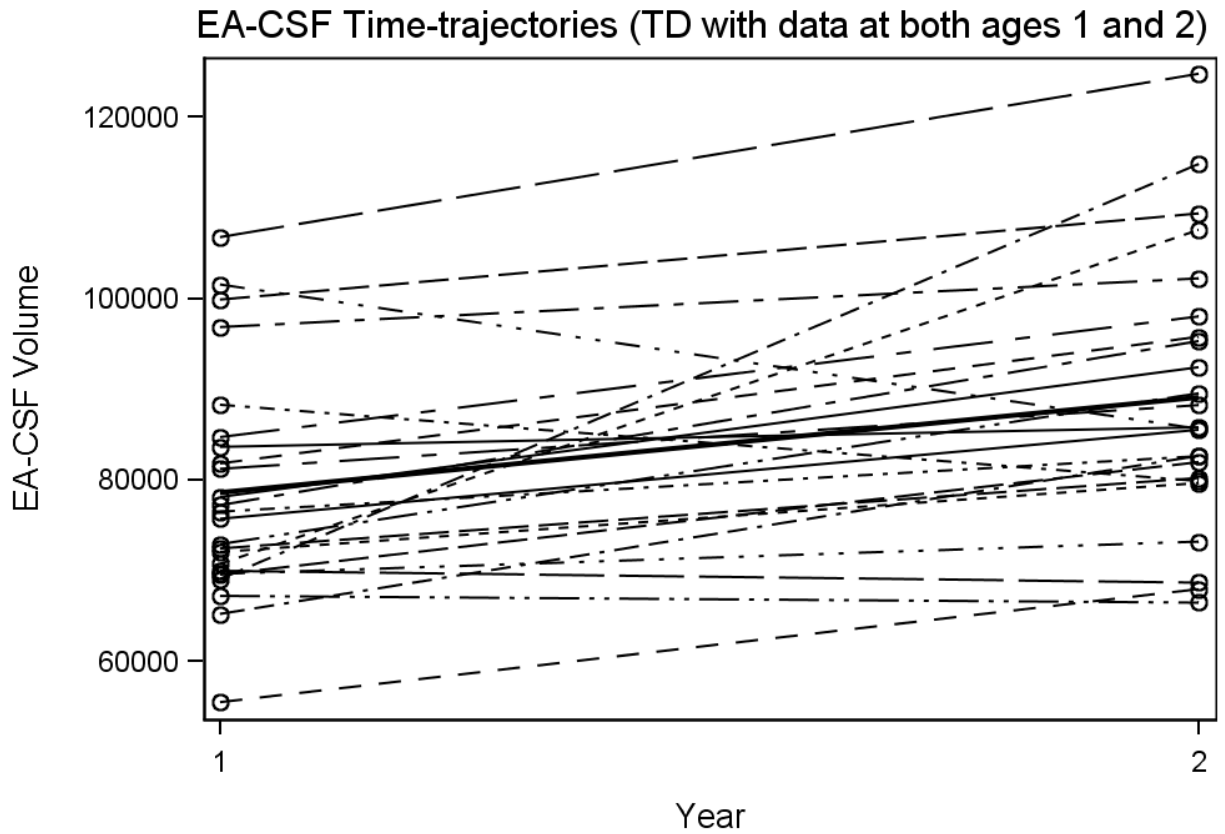

Figure S1.

**Mullen Gross Motor Score Relationship to EA-CSF Volume by Group**

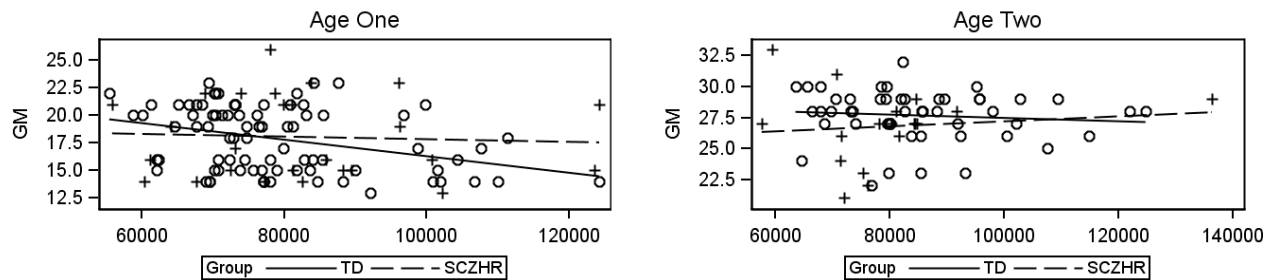

Mullen Gross Motor Relationship to EA-CSF at Age 1 (N=108; TD=82, SCZHR=26)

| Group   | Mean (SD)    | Median | Minimum/Maximum | Information Type                            | R-Square | Estimate (SD)               | Statistic     | P-value |
|---------|--------------|--------|-----------------|---------------------------------------------|----------|-----------------------------|---------------|---------|
|         |              |        |                 | Model                                       | 0.081583 |                             | F(3,104)=3.08 | .031*   |
| Overall | 17.92 (3.12) | 18     | 13/26           | Group Effect                                |          |                             | F(1,104)=1.78 | .185    |
| TD      | 17.88 (2.92) | 18     | 13/23           | EA-CSF Slope in TD                          |          | -0.00007517<br>(0.00002496) | t(104)=-3.01  | .003*   |
| SCZHR   | 18.04 (3.73) | 16.5   | 13/26           | EA-CSF Slope in SCZHR                       |          | -0.00001190<br>(0.00003536) | t(104)=-0.43  | .737    |
|         |              |        |                 | Group difference in EA-CSF Slope (SCZHR-TD) |          | 0.00006327<br>(0.00004328)  | t(104)=1.46   | .147    |
|         |              |        |                 | EA-CSF Effect                               |          |                             | F(1,104)=4.05 | .047*   |

Mullen Gross Motor Relationship to EA-CSF at Age 2 (N=67; TD=49, SCZHR=18)

| Group   | Mean (SD)    | Median | Minimum/Maximum | Information Type                            | R-Square | Estimate (SD)               | Statistic    | P-value |
|---------|--------------|--------|-----------------|---------------------------------------------|----------|-----------------------------|--------------|---------|
|         |              |        |                 | Model                                       | 0.037558 |                             | F(3,63)=0.82 | .488    |
| Overall | 27.42 (2.36) | 28     | 21/33           | Group Effect                                |          |                             | F(1,63)=1.09 | .301    |
| TD      | 27.65 (2.09) | 28     | 22/32           | EA-CSF Slope in TD                          |          | -0.00001344<br>(0.00002339) | t(63)=-0.57  | .568    |
| SCZHR   | 26.78 (2.96) | 27     | 21/33           | EA-CSF Slope in SCZHR                       |          | 0.00002016<br>(0.00003478)  | t(63)=0.58   | .564    |
|         |              |        |                 | Group difference in EA-CSF Slope (SCZHR-TD) |          | 0.00003360<br>(0.00004191)  | t(63)=0.80   | .426    |
|         |              |        |                 | EA-CSF Effect                               |          |                             | F(1,63)=0.03 | .873    |

**Figure S2.**

**Mullen Gross Motor Score Relationship to EA-CSF Volume in Typically Developing Subjects by Gender**

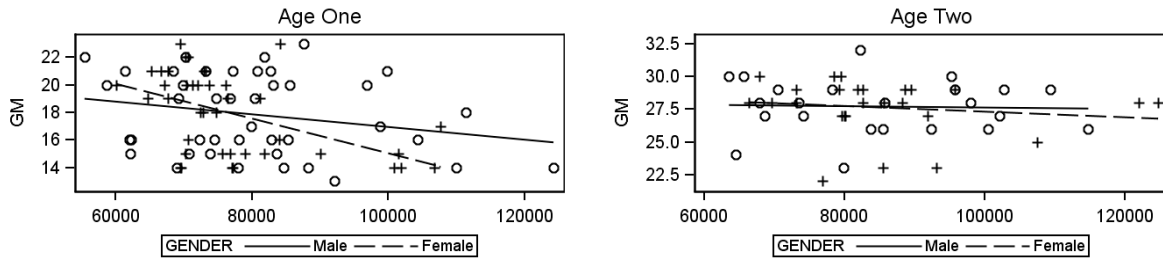

Mullen Gross Motor Relationship to EA-CSF in Typically Developing Subjects at Age 1 (N=82; Female=40, Male=42)

| Group      | Mean (SD)    | Median | Minimum/Maximum | Information Type                        | R-Square | Estimate (SD)               | Statistic     | P-value |
|------------|--------------|--------|-----------------|-----------------------------------------|----------|-----------------------------|---------------|---------|
|            |              |        |                 | Model                                   | 0.152523 |                             | F(3,78)=4.68  | .005*   |
| Overall TD | 17.88 (3.12) | 18     | 13/23           | Gender Effect                           |          |                             | F(1,78)=2.66  | .107    |
| Female     | 17.92 (2.96) | 18.5   | 14/23           | EA-CSF Slope in Female                  |          | -0.00012617<br>(0.00003729) | t(78)=-3.38   | .001*   |
| Male       | 17.83 (2.92) | 17.5   | 13/23           | EA-CSF Slope in Male                    |          | -0.00004612<br>(0.00002879) | t(78)=-1.60   | .113    |
|            |              |        |                 | Gender difference in EA-CSF Slope (F-M) |          | -0.00008005<br>(0.00004711) | t(78)=1.70    | .093    |
|            |              |        |                 | EA-CSF Effect                           |          |                             | F(1,78)=13.37 | <.001*  |

Mullen Gross Motor Relationship to EA-CSF in Typically Developing Subjects at Age 2 (N=49; Female=29, Male=23)

| Group      | Mean (SD)    | Median | Minimum/Maximum | Information Type                        | R-Square | Estimate (SD)               | Statistic    | P-value |
|------------|--------------|--------|-----------------|-----------------------------------------|----------|-----------------------------|--------------|---------|
|            |              |        |                 | Model                                   | 0.012474 |                             | F(3,45)=0.19 | .903    |
| Overall TD | 27.65 (2.09) | 28     | 21/33           | Gender Effect                           |          |                             | F(1,45)=0.13 | .720    |
| Female     | 27.65 (2.09) | 28     | 21/32           | EA-CSF Slope in Female                  |          | -0.00002155<br>(0.00002985) | t(45)=-0.72  | .474    |
| Male       | 26.78 (2.96) | 27     | 21/33           | EA-CSF Slope in Male                    |          | -0.00000521<br>(0.00002991) | t(45)=0.17   | .863    |
|            |              |        |                 | Gender difference in EA-CSF Slope (F-M) |          | -0.00001634<br>(0.00004226) | t(45)=0.39   | .701    |
|            |              |        |                 | EA-CSF Effect                           |          |                             | F(1,45)=0.40 | .530    |

Figure S3.
